# Supplementary material for: Monolithic hydrogel nanowells-in-microwells enabling simultaneous single cell secretion and phenotype analysis
Source: Royal Society of Chemistry journal article supplement (doi:10.1039/d0lc00965b), 2020-01-01
Supplement: d0lc00965b1.pdf [file d0lc00965b1.pdf]

## Supplemental Information

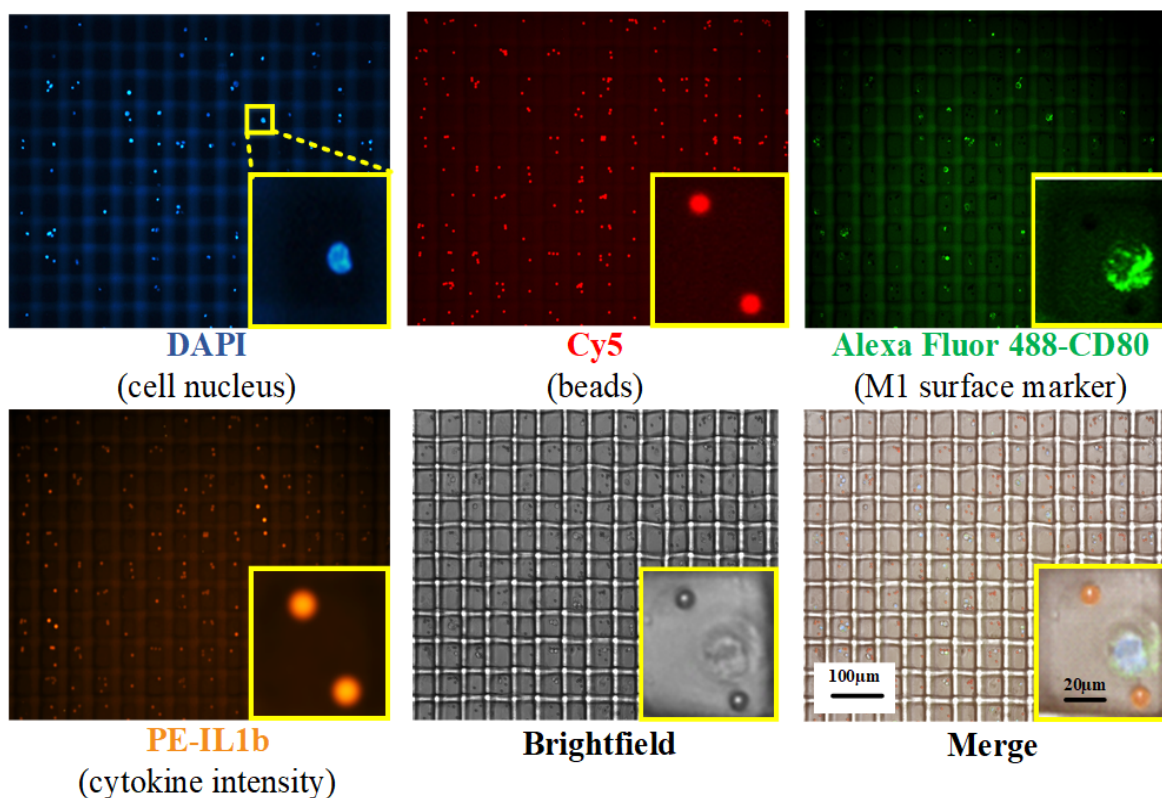

**Fig. S1. Image analysis pipeline.** M1 macrophages were used as a model analyte. The nanowell images were captured in blue, red, green and orange channels to identify cell nucleus (DAPI), beads (Cy5), cell phenotype (Alexa fluor 488-CD80) and cytokine (PE-IL1b), respectively. Four channel-images were merged. Cells and beads were then analyzed using NIS software to determine cell surface intensity and bead intensity, respectively.

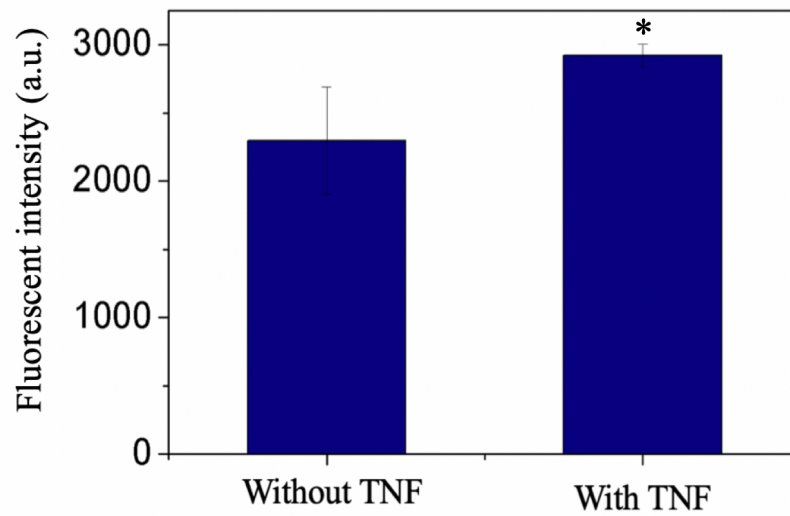

**Fig. S2. Bulk IL8 secretion assay for MDA-MB-231 cells with and without TNF stimulation.** Secretion of bulk MDA-MB-231 cells were detected. Stimulated cells secrete more IL8 compared to unstimulated cells. (\* $p < 0.05$  relative to untreated cell)

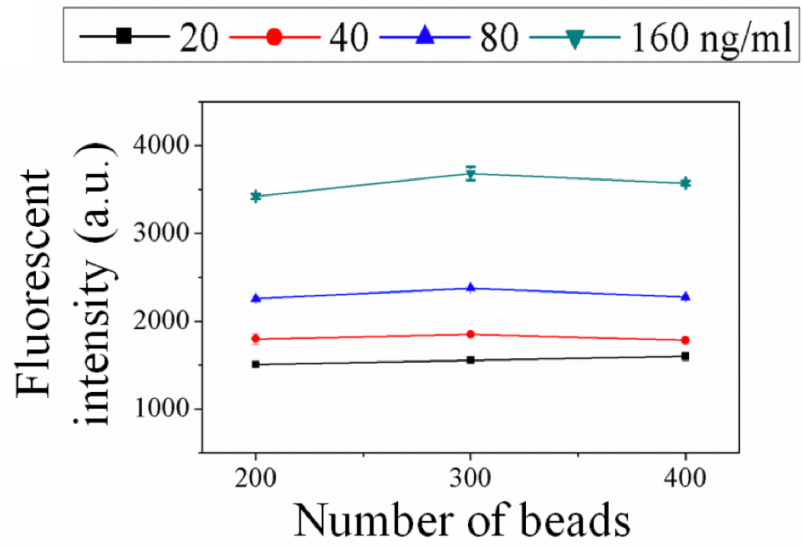

**Fig. S3. Dependence of bead fluorescence intensity on the total number of beads.** The measured IL-8 concentration was independent of the number of beads.

**A** Standard medium

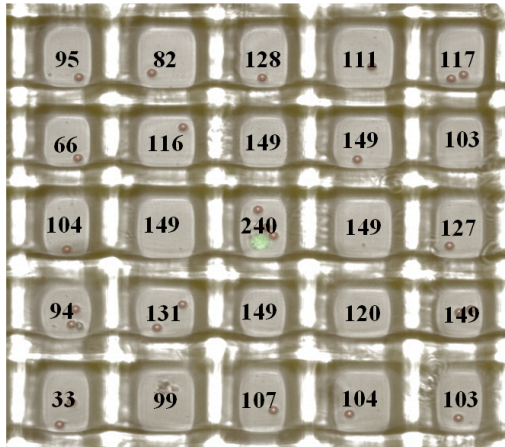

**B** 0.005% MC

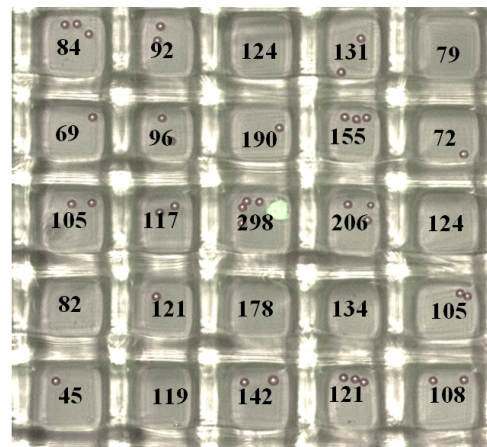

**C** 0.01% MC

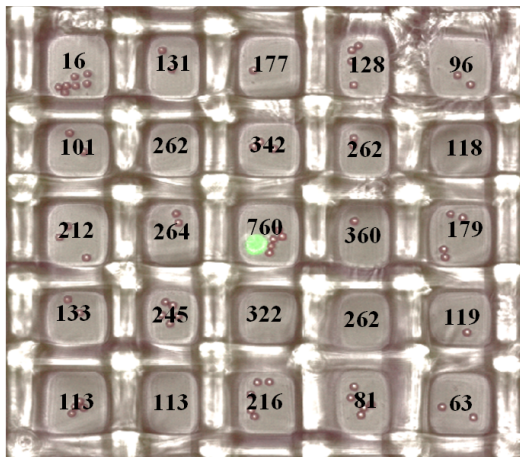

**D** 0.05% MC

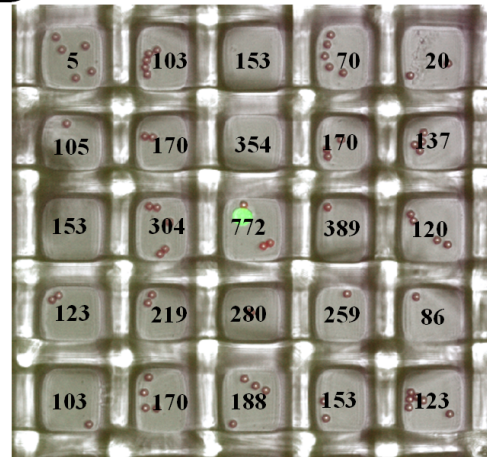

**Fig. S4. Measurement of bead fluorescence intensity with different concentration of methylcellulose.** Compared to (A) standard medium and (B) 0.005% MC, greater concentrations of methylcellulose e.g., (C) 0.01% & (D) 0.05% have higher capability of confining cytokine within nanowells.



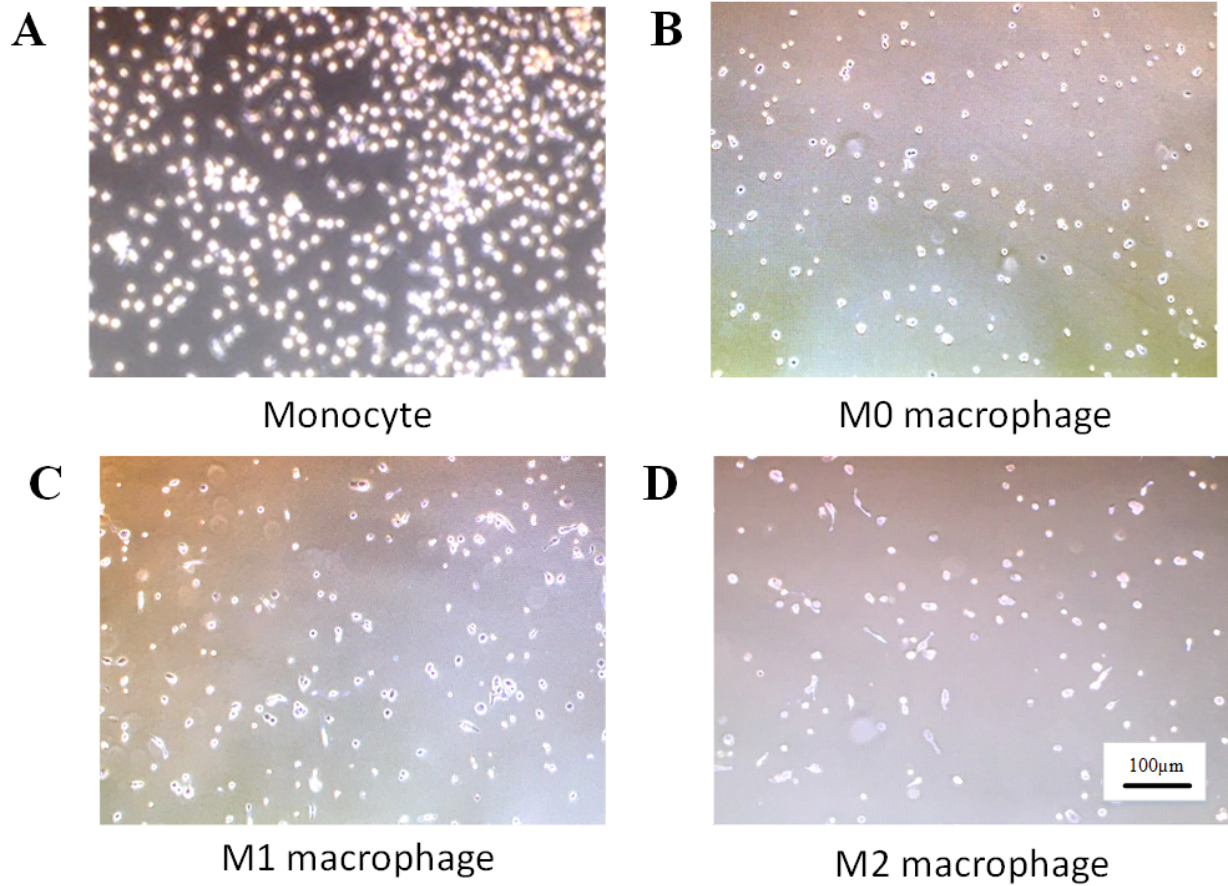

**Fig. S5. Morphology of THP-1 monocytes, M0, M1 and M2 macrophages.** (A) THP-1 monocytes are suspension cells which became adherent cells once they were differentiated to (B) M0 macrophages. (C) M1 and (D) M2 macrophages appear as adherent cells.

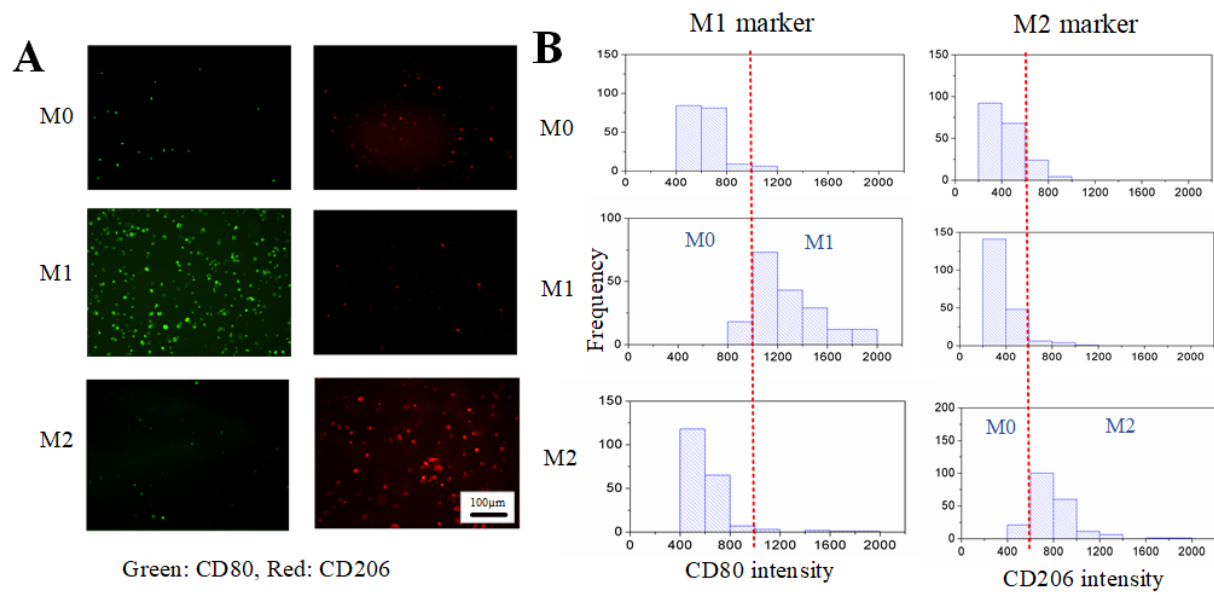

**Fig. S6. Surface marker expression of M0, M1 and M2 macrophages.** The M1 and M2 cells exhibit characteristic increase in CD80 and CD206 expression, respectively based on **(A)** image observation and **(B)** histogram.

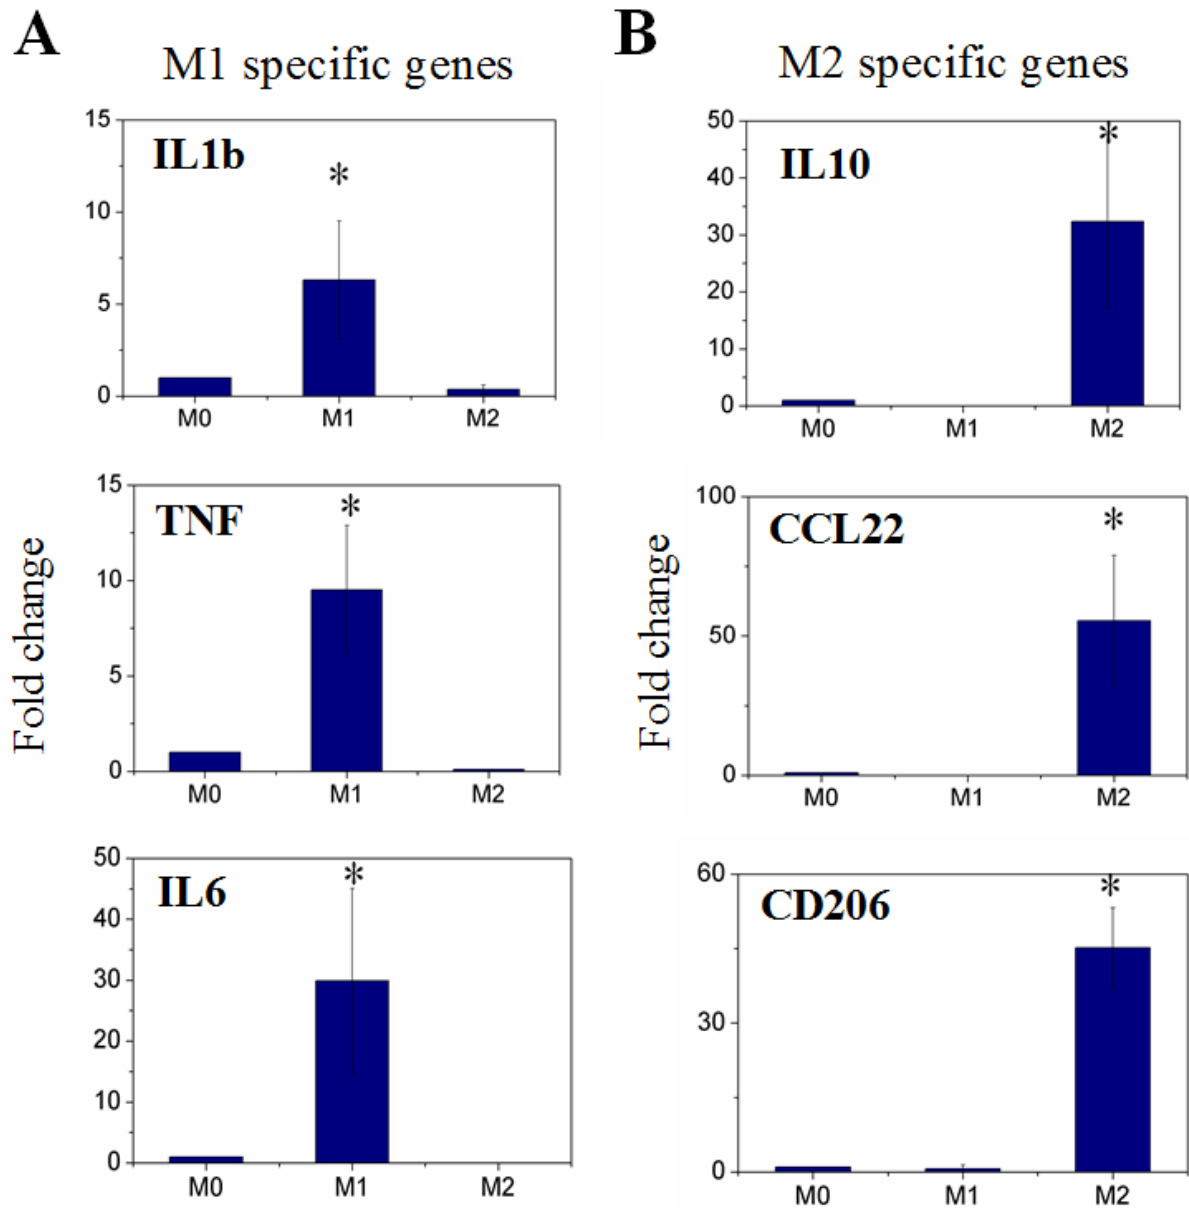

**Fig. S7. Gene expression analysis of M0, M1 and M2 macrophages.** The result shows that most M1 cells express (A) M1 specific genes (*i.e.*, IL1b, TNF and IL6) while (B) M2 cells express M2 specific genes (*i.e.*, IL10, CCL22 and CD206), which further prove the efficiency of polarization. (\* $p < 0.05$  relative to M0)
